# Supplementary material
Source: Springer Nature journal article supplement (https://www.springermedizin.de/resource/supplementary/12885_2012_3652_MOESM11_ESM.pdf/9463764)

**a****MCF10DCIS xenograft tumors**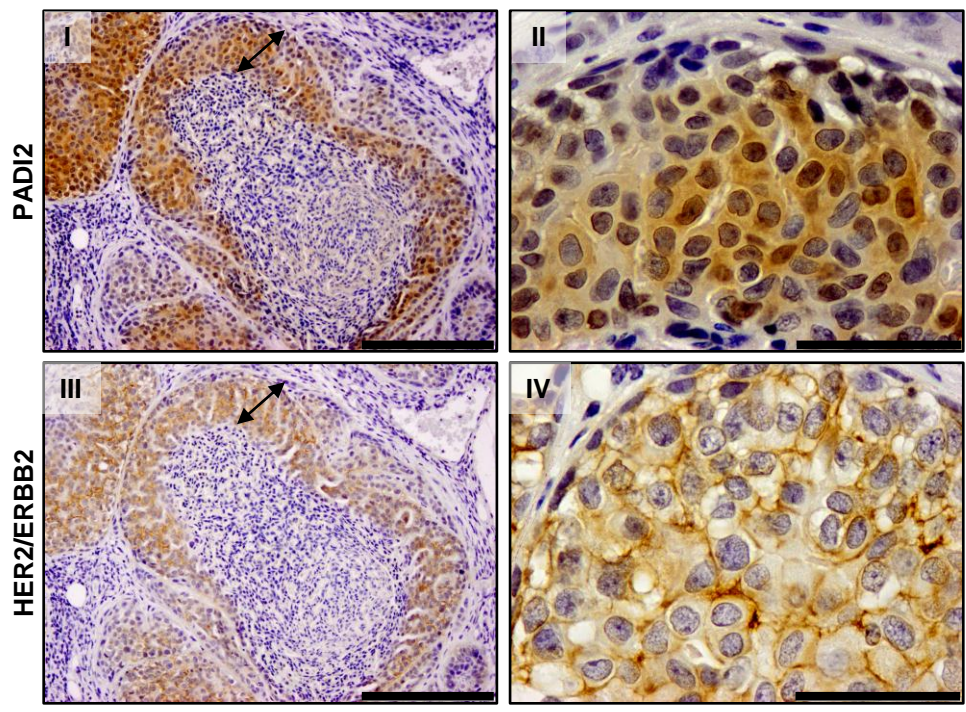**b**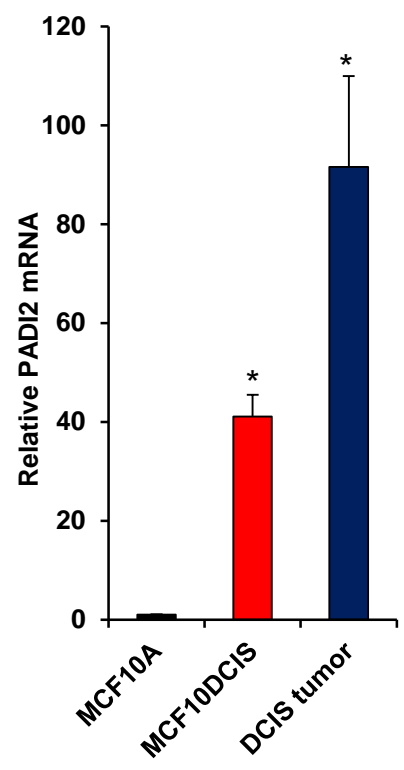**c****MCF10DCIS xenograft tumors**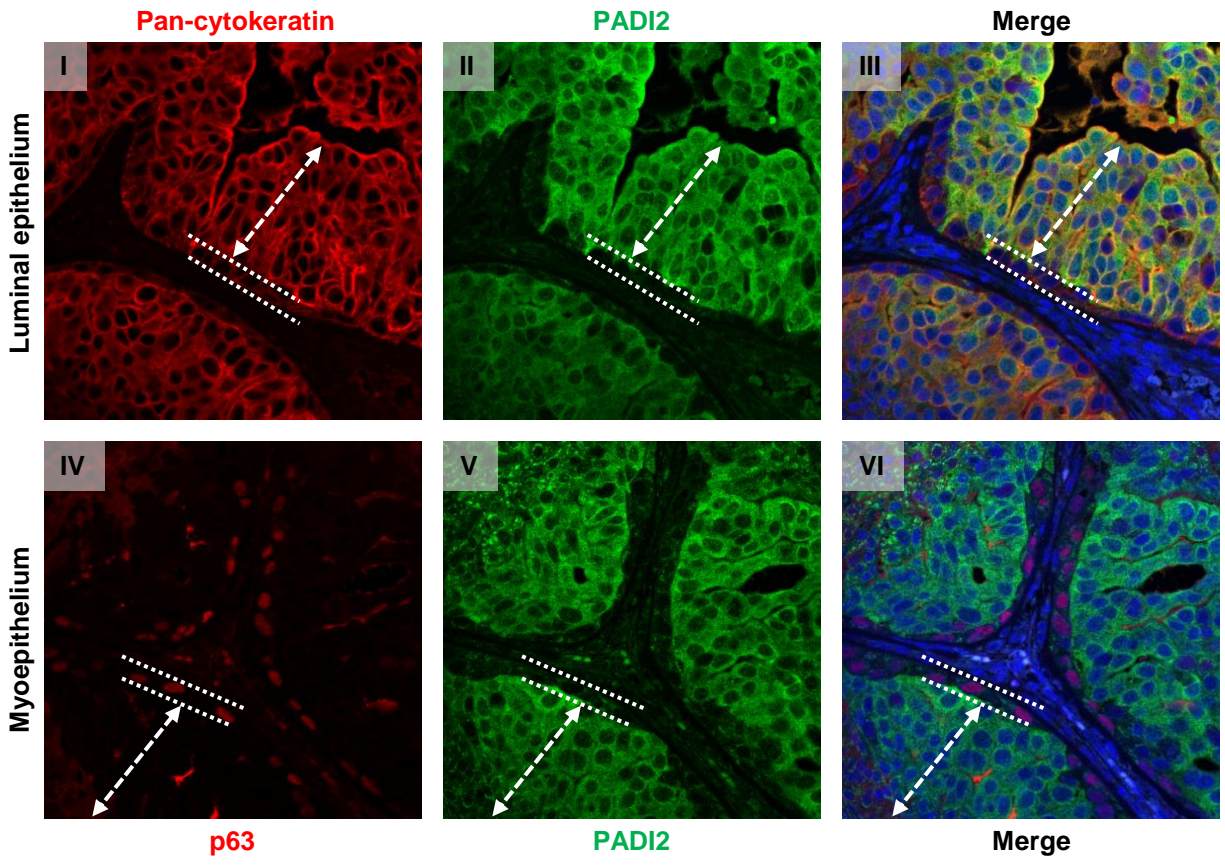

Supplement: MOESM11 [file 9463764]
